# Supplementary material for: Quality of evidence in a post-Soviet country: evaluation of methodological quality of controlled clinical trials published in national journals from Uzbekistan
Source: BMC Med Res Methodol. 2020 Jul 13;20:189. doi: 10.1186/s12874-020-01076-x (PMC7359460; doi:10.1186/s12874-020-01076-x)
Supplement: Supplementary file 1 — Additional file 1: Supplementary file 1. [file 12874_2020_1076_MOESM1_ESM.xls]

## Sheet: Лист2
		Was the study described as randomized (this includes the use of words such as randomly, random, and randomization)?	Was the study described as double blind?	Was there a description of withdrawals and dropouts? (Participants who were included in the study but did not complete the observation period or who were not included in the analysis must be described. If there were no withdrawals, it should be stated in the article).	Was the method to generate the sequence of randomization described and appropriate? (If described and appropriate +1 If described but not appropriate -1)	Was the method of double blinding described and appropriate (identical placebo, active placebo, dummy, etc.)? If described and appropriate +1 If described but not appropriate (e.g., comparison of tablet vs. injection with no double dummy) –1.	Total score of every included RCT received by consensus (from 0 to 5)	Sample size of the included RCTs
Code	Studies	Question#1	Question#2	Question#3	Additional#1	Additional#2	Total score	Sample size	всего оригинал.исследований	примечание
MJU2007.1	1	0	0	0			0	n=37
MJU2007.1	2	0	0	0			0	n=60
MJU2007.1	3	0	0	0			0	n=27
MJU2007.2	4	0	0	0			0	n=30
MJU2007.2	5	0		0			0	n=34
MJU2007.4	6	0	0	0			0	n=182
MJU2007.5	7	0	0	0			0	n=60
MJU2007.5	8	0		0			0	n=89
MJU2007.5	9	0	0	0			0	n=77
MJU2007.5	10	0	0	0			0	n=50
MJU2007.6	11	0	0	0			0	n=70
MJU2007.6	12	1	0	0	-1		0	n=71
MJU2007.6	13	0	0	0			0	n=76
MJU2008.1	14	0	0	0			0	n=81
MJU2008.1	15	1	0	0	-1		0	n=50
MJU2008.1	16	0	0	0			0	n=129
MJU2008.1	17	0	0	0			0	n=76
MJU2008.1	18	0	0	0			0	n=58
MJU2008.2	19	0	0	0			0	n=160
MJU2008.2	20	0	0	0			0	n=50
MJU2008.3	21	0	0	0			0	n=132
MJU2008.3	22	0	0	0			0	n=72
MJU2008.3	23	0	0	0			0	n=109
MJU2008.3	24	0	0	0			0	n=69
MJU2008.4	25	0	0	0			0	n=63
MJU2008.4	26	0	0	0			0	n=50
MJU2008.4	27	0	0	0			0	n=64
MJU2008.6	28	0	0	0			0	n=88
MJU2008.6	29	0	0	0			0	n=63
MJU2008.6	30	0	0	0			0	n=39
MJU2008.6	31	0	0	0			0	n=47
MJU2008.6	32	0	0	0			0	n=60
MJU2008.6	33	0	0	0			0	n=193
MJU2009.1	34	0	0	1			1	n=103	23
MJU2009.1	35	0		0			0	n=80
MJU2009.1	36	0	0	0			0	n=35
MJU2009.1	37	0	0	0			0	n=119
MJU2009.1	38	0	0	0			0	n=116
MJU2009.3	39	0	0	0			0	n=30	18
MJU2009.3	40	0	0	0			0	n=69
MJU2009.3	41	0	0	0			0	n=508
MJU2009.3	42	0	0	0			0	n=113
MJU2009.4	43	0	0	0			0	n=66
MJU2009.5	44	0	0	0			0	n-319
MJU2009.5	45	0	0	0			0	n=118
MJU2009.5	46	0	0	0			0	n=22
MJU2009.5	47	0		0			0	n=72
MJU2009.5	48	0	0	0			0	n=63
MJU2009.6	49	0	0	0			0	n=163
MJU2009.6	50	0	0	0			0	n=107
MJU2009.6	51	0	0	0			0	n=84
MJU2010.1	No articles
MJU2010.2	52	0	0	0			0	n=233
MJU2010.2	53	0	0	0			0	n=100
MJU2010.3	No articles
MJU2010.4	54	0	0	0			0	n=35
MJU2010.4	55	0	0	0			0	n=85
MJU2010.5	56	0	0	0			0	n=52
MJU2010.5	57	0	0	0			0	n=30
MJU2010.5	58	0	0	0			0	n=100
MJU2010.6	59	0	0	0			0	n=290
MJU2011.6	60	0	0	0			0	n=79	12
MJU2011.6	61	0	0	0			0	n=70
MJU2011.5	62	0	0	0			0	n=48	16
MJU2011.5	63	0	0	0			0	n=68
MJU2011.5	64	0		0			0	n=60
MJU2011.5	65	0	0	0			0	n=37
MJU2011.5	66	0	0	0			0	n=83
MJU2011.5	67	0	0	0			0	n=24
MJU2011.5	68	0	0	0			0	n=62
MJU2011.5	69	0		0			0	n=13
MJU2011.5	70	0	0	0			0	n=251
MJU2011.4	71	0	0	0			0	n=74	11
MJU2011.4	72	0	0	0			0	n=70
MJU2011.4	73	0	0	0			0	n=40
MJU2011.4	74	0	0	0			0	n=61
MJU2011.4	75	0	0	0			0	n=32
MJU2011.3	76	0	0	0			0	n=29	16
MJU2011.3	77	0	0	1			1	n=168
MJU2011.3	78	0	0	0			0	n=700
MJU2011.3	79	0	0	0			0	n=136
MJU2011.3	80	0	0	0			0	n=25
MJU2011.3	81	0	0	0			0	n=31
MJU2011.3	82	0	0	0			0	n=30
MJU2011.3	83	0	0	0			0	n=20
MJU2011.3	84	0	0	0			0	n=430
MJU2011.3	85	0	0	0			0	n=40
MJU2011.2	86	0	0	0			0	n=549	9
MJU2011.2	87	0	0	0			0	n=165
MJU2011.2	88	0	0	0			0	n=60
MJU2011.2	89	0	0	0			0	n=347
MJU2011.1	90	0	0	0			0	n=23	15
MJU2011.1	91	0		0			0	n=71
MJU2011.1	92	0	0	0			0	n=58
MJU2011.1	93	0	0	0			0	n=18
MJU2012.1	94	0	0	0			0	n=56	8
MJU2012.1	95	0	0	0			0	n=388
MJU2012.2	96	0	0	0			0	n=63	12
MJU2012.2	97	0	1	0		-1	0	n=58
MJU2012.2	98	0	0	0			0	n=76
MJU2012.3	99	0	0	1			1	n=118	13
MJU2012.3	100	0	0	0			0	n=154
MJU2012.3	101	0	0	0			0	n=74
MJU2012.3	102	0	0	0			0	n=111
MJU2012.3	103	0	0	0			0	n=50
MJU2012.3	104	0	0	0			0	n=71
MJU2012.4	105	0	0	0			0	n=40	30
MJU2012.4	106	0	0	0			0	n=86
MJU2012.5	107	0	0	1			1	n=50	11
MJU2012.5	108	0	0	0			0	n=40
MJU2012.6	109	0	0	0			0	n=57	11
MJU2012.6	110	0	0	0			0	n=69
MJU2012.6	111	0	0	0			0	n=48
MJU2013.1	112	0	0	0			0	n=40	18
MJU2013.1	113	0	0	0			0	n=134
MJU2013.1	114	0	0	0			0	n=51
MJU2013.1	115	0	0	0			0	n=96
MJU2013.2	116	0	0	0			0	n=960	20
MJU2013.2	117	0	0	0			0	n=46
MJU2013.3	118	0	0	0			0	n=369	13
MJU2013.3	119	0	0	0			0	n=226
MJU2013.4	120	0	0	0			0	n=80
MJU2013.4	121	0	0	0			0	n=52
MJU2013.5	122	0	0	0			0	n=32
MJU2013.5	123	0	0	0			0	n=215
MJU2013.6	124	0	0	1			1	n=40	15
MJU2013.6	125	0	0	0			0	n=38
MJU2013.6	126	0	0	0			0	n=60
MJU2013.6	127	0	0	0			0	n=283
MJU2013.6	128	1	0	0	-1		0	n=57
MJU2014.1	129	0	0	0			0	62	23
MJU2014.1	130	0	0	0			0	234
MJU2014.1	131	0	0	0			0	90
MJU2014.1	132	0	0	0			0	64
MJU2014.1	133	0	0	0			0	40
MJU2014.2	134	0	0	1			1	19	20
MJU2014.2	135	0	0	0			0	99
MJU2014.2	136	0	0	0			0	30
MJU2014.2	137	0	0	0			0	15
MJU2014.2	138	0	0	0			0	17
MJU2014.3	139	0	0	0			0	40	27
MJU2014.3	140	0		0			0	120
MJU2014.3	141	0	0	0			0	66
MJU2014.3	142	0	0	0			0	19
MJU2014.3	143	0	0	0			0	27
MJU2014.4	144	0	0	0			0	136	16
MJU2014.4	145	0	0	0			0	75
MJU2014.4	146	0	0	0			0	30
MJU2014.4	147	0	0	0			0	50
MJU2014.5	148	0	0	0			0	16	14
MJU2014.5	149	0	0	0			0	64
MJU2014.5	150	0	0	0			0	54
MJU2014.5	151	0	0	0			0	32
MJU2014.5	152	0	0	0			0	60
MJU2014.6	153	0	0	0			0	32	25
MJU2014.6	154	0	0	0			0	25
MJU2014.6	155	0	0	0			0	146
MJU2014.6	156	0	0	0			0	86
MJU2015.1	157	0	0	0			0	65	17
MJU2015.1	158	0	0	0			0	224
MJU2015.1	159	0	0	0			0	45
MJU2015.1	160	0	0	0			0	42
MJU2015.1	161	0	0	0			0	62
MJU2015.1	162	0	0	0			0	107
MJU2015.1	163	0	0	0			0	50
MJU2015.1	164	0	0	0			0	112
MJU2015.2	165	0	0	0			0	30	28
MJU2015.2	166	0	0	1			1	47
MJU2015.2	167	0	0	0			0	80
MJU2015.2	168	0	0	0			0	103
MJU2015.2	169	0	0	0			0	70
MJU2015.3	170	0	0	0			0	40	17
MJU2015.3	171	0	1	0		-1	0	152
MJU2015.3	172	0	0	0			0	72
MJU2015.3	173	0	0	0			0	48
MJU2015.4	174	0	0	0			0	56	17
MJU2015.5	175	0	0	0			0	30	19
MJU2015.5	176	0	0	0			0	157
MJU2015.5	177	0	0	0			0	56
MJU2015.5	178	0	0	0			0	38
MJU2015.5	179	0	0	0			0	43
MJU2015.5	180	0	0	0			0	170
MJU2015.5	181	0	0	0			0	14
MJU2015.6	182	0		0			0	45	26
MJU2015.6	183	0	0	1			1	86
MJU2015.6	184	0	0	0			0	33
MJU2015.6	185	0	0	0			0	111
MJU2015.6	186	0	0	0			0	61
MJU2015.6	187	0	0	0			0	62
MJU2015.6	188	0	0	0			0	68
MJU2015.6	189	0		0			0	42
MJU2015.6	190	0	0	0			0	110
MJU2016.1	191	0	0	0			0	n=164	17
MJU2016.1	192	0	0	0			0	n=30
MJU2016.1	193	0	0	0			0	n=47
MJU2016.1	194	1	0	0	-1		0	n=20
MJU2016.1	195	0	0	0			0	n=9
MJU2016.2	196	0	0	0			0	n=2563	23
MJU2016.2	197	0	0	0			0	n=174
MJU2016.2	198	0	0	0			0	n=24
MJU2016.2	199	0	0	0			0	n=121
MJU2016.2	200	0	0	0			0	n=63
MJU2016.2	201	0	0	1			1	n=31
MJU2016.2	202	0	0	0			0	n=54
MJU2016.2	203	0	0	0			0	n=804
MJU2016.3	204	0	0	0			0	n=155	17
MJU2016.3	205	0		0			0	n=37
MJU2016.3	206	0	0	0			0	n=45
MJU2016.3	207	0	0	0			0	n=150
MJU2016.3	208	0	0	0			0	n=120
MJU2016.3	209	0	0	1			1	n=950
MJU2016.3	210	0		0			0	n=30
MJU2016.4	211	0	0	0			0	n=230	20
MJU2016.5	212	0	0	0			0	n=217
MJU2016.5	213	0	0	0			0	n=1260
MJU2016.5	214	0	0	0			0	n=136
MJU2016.5	215	0	0	0			0	n=86
MJU2016.5	216	0	0	0			0	n=71	13
MJU2016.5	217	0	0	0			0	n=26
MJU2016.5	218	0	0	0			0	n=30
MJU2016.6	219	0	0	0			0	n=212	26
MJU2016.6	220	0	0	0			0	n=369
MJU2016.6	221	0	0	0			0	n=21
MJU2016.6	222	0	0	0			0	n=120
MJU2016.6	223	0	0	0			0	n=283
MJU2017.2	224	0		0			0	n=305	28
MJU2017.4	225	0	0	0			0	n=65	19
MJU2017.4	226	0	0	0			0	n=26
MJU2017.5	227	1	0	0	-1		0	n=34	18
MJU2017.5	228	0	0	0			0	n=74
MJU2017.5	229	0	0	0			0	n=214
MJU2017.6	230	0	0	0			0	n=15	20
MJU2017.6	231	0	0	0			0	n=81
MJU2017.6	232	0	0	0			0	n=122
MJU2017.6	233	1	0	0	-1		0	n=235
JP2007.1	1	0	0	0			0	n=100	32
JP2007.1	2	0	0	0			0	n=50
JP2007.1	3	0	0	0			0	n=260
JP2007.1	4	0	0	0			0	n=14	29
JP2007.2	5	0	0	0			0	n=20
JP2007.2	6	0	0	1			1	n=23
JP2007.2	7	0	0	0			0	n=62
JP2007.2	8	0	0	0			0	n=62
JP2007.3-4	9	0	0	0			0	n=100	26
JP2007.3-4	10	0	0	0			0	n=90
JP2007.3-4	11	0	0	0			0	n=299
JP2007.3-4	12	0		0			0	n=120
JP2007.3-4	13	0	0	0			0	n=58
JP2007.3-4	14	0	0	0			0	n=84
JP2007.3-4	15	0	0	0			0	n=56
JP2007.3-4	16	0	0	0			0	n=34
JP2007.3-4	17	0	0	0			0	n=49
JP2008.1-2	18	0	0	0			0	n=51	23
JP2008.1-2	19	0	0	0			0	n=138
JP2008.1-2	20	0	0	0			0	n=114
JP2008.1-2	21	0	0	0			0	n=30
JP2008.1-2	22	0	0	0			0	n=64
JP2008.1-2	23	0	0	0			0	n-45
JP2008.1-2	24	0	0	0			0	n=32
JP2008.1-2	25	0	0	0			0	n=45
JP2008.3-4	26	0	0	0			0	n=25	19
JP2008.3-4	27	0	0	0			0	n=57
JP2008.3-4	28	0	0	0			0	n=91
JP2008.3-4	29	0	0	0			0	n=400
JP2008.3-4	30	0	0	0			0	n=49
JP2009.1-2	31	0	0	0			0	n=25	23
JP2009.1-2	32	0	0	0			0	n=38
JP2009.1-2	33	0	0	1			1	n=67
JP2009.1-2	34	0	0	0			0	n=34
JP2009.1-2	35	0	0	0			0	n=123
JP2009.1-2	36	0	0	0			0	n=301
JP2009.1-2	37	0	0	0			0	n=111
JP2009.3-4	38	0	0	1			1	n=28	23
JP2009.3-4	39	0	0	0			0	n=83
JP2009.3-4	40	0	0	0			0	n=146
JP2010.1-2	41	0	0	0			0	n=30	12
JP2010.1-2	42	0	0	0			0	n=76
JP2010.1-2	43	0		0			0	n=65
JP2010.1-2	44	0	0	0			0	n=42
JP2010.1-2	45	0	0	0			0	n=27
JP2010.1-2	46	0	0	0			0	n=80
JP2010.3-4	47	0	0	0			0	n=76	18
JP2010.3-4	48	0	0	0			0	n=80
JP2010.3-4	49	0	0	0			0	n=37
JP2010.3-4	50	0	0	0			0	n=87
JP2010.3-4	51	0	0	0			0	n=61
JP2010.3-4	52	0	0	0			0	n=31
JP2011.1-2	53	0	0	0			0	n=175	18
JP2011.3-4	54	0	0	0			0	n=204	18
JP2012.3-4	55	0	0	0			0	n=147	33
JP2012.3-4	56	0	0	0			0	n=130
JP2012.3-4	57	0	0	0			0	n=142
JP2012.3-4	58	0	0	0			0	n=122
JP2012.3-4	59	0	0	1			1	n=-193
JP2012.3-4	60	0	0	0			0	n=114
JP2012.3-4	61	0	0	0			0	n=94
JP2012.3-4	62	0	0	0			0	n=55
JP2012.3-4	63	0		0			0	n=70
JP2013.1-2	64	0	0	0			0	n=61	25
JP2013.1-2	65	0	0	0			0	n=50
JP2013.1-2	66	0	0	0			0	n=122
JP2013.1-2	67	0	0	0			0	n=163
JP2013.1-2	68	0	0	0			0	n=973
JP2013.1-2	69	0	0	0			0	n=69
JP2013.3-4	70	0	0	0			0	n=134	46
JP2013.3-4	71	0	0	0			0	n=1721
JP2013.3-4	72	0	0	0			0	n=256
JP2013.3-4	73	0	0	0			0	n=48
JP2013.3-4	74	0	0	0			0	n=300
JP2013.3-4	75	0	0	0			0	n=50
JP2014.1-2	76	0	0	0			0	n=74	29
JP2014.1-2	77	0	0	0			0	150
JP2014.1-2	78	0	0	0			0	92
JP2014.1-2	79	0	0	0			0	102
JP2014.1-2	80	0	0	1			1	75
JP2014.1-2	81	0	0	0			0	58
JP2014.1-2	82	0	0	0			0	10
JP2014.3-4	83	0	0	0			0	46	30
JP2014.3-4	84	0	0	0			0	120
JP2014.3-4	85	0	0	0			0	45
JP2014.3-4	86	0	0	0			0	20
JP2014.3-4	87	0	0	0			0	44
JP2014.3-4	88	0	0	0			0	103
JP2014.3-4	89	1	0	1	-1		1	60
JP2014.3-4	90	0	0	0			0	50
JP2015.1-2	91	0	0	0			0	135	30
JP2015.1-2	92	0	0	0			0	25
JP2015.1-2	93	0	0	0			0	72
JP2015.1-2	94	0	0	0			0	88
JP2015.1-2	95	0	0	0			0	122
JP2015.1-2	96	0	0	0			0	447
JP2015.3-4	97	0	0	0			0	100		conference materials
JP2015.3-4	98	0	0	0			0	40
JP2015.3-4	99	0	0	0			0	21
JP2015.3-4	100	0		0			0	30
JP2015.3-4	101	0	0	0			0	36
JP2015.3-4	102	0	0	0			0	89
JP2015.3-4	103	0	0	0			0	99
JP2015.3-4	104	0	0	0			0	102
JP2015.3-4	105	0	0	0			0	87
JP2015.3-4	106	1	0	0	-1		0	50
JP2015.3-4	107	0		0			0	98
JP2015.3-4	108	0	0	0			0	40
JP2015.3-4	109	0	0	0			0	45
JP2015.3-4	110	0	0	0			0	48
JP2015.3-4	111	0	0	0			0	652
JP2015.3-4	112	0	0	0			0	200
JP2016.1-2	113	0	0	0			0	388	28
JP2016.3-4	114	0	0	0			0	447
JP2016.3-4	115	0	0	0			0	44
JP2016.3-4	116	0		0			0	68
JP2016.3-4	117	0	0	0			0	60
JP2016.3-4	118	0	0	0			0	88
JP2016.3-4	119	0	0	0			0	50
JP2016.3-4	120	0	0	0			0	50
JP2016.3-4	121	0	0	0			0	104
JP2016.3-4	122	0	0	0			0	53
JP2016.3-4	123	0	0	0			0	72
JP2016.3-4	124	0	0	0			0	18
JP2016.3-4	125	0	0	0			0	30
JP2017.1	126	1	0	0	-1		0	n=40	23
JP2017.1	127	0	0	0			0	n=62
JP2017.1	128	0	0	0			0	n=102
JP2017.1	129	0	0	0			0	n=70
JP2017.1	130	0	0	0			0	n=32
JP2017.1	131	1	0	0	-1		0	n=60
JP2017.1	132	0	0	0			0	n=40
JP2017.1	133	0	0	0			0	n=45
JP2017.1	134	0	0	0			0	n=16
JP2017.2	135	0	0	0			0	n=55	28
JP2017.2	136	0	0	0			0	n=445
JP2017.2	137	0	0	0			0	n=104
JP2017.2	138	1	0	0	-1		0	n=60
JP2017.2	139	0	0	1			1	n=50
JP2017.3	140	0	0	0			0	n=23	31
JP2017.3	141	0	0	0			0	n=38
JP2017.3	142	0	0	0			0	n=40
JP2017.4	143	0	0	0			0	n=110	44
JP2017.4	144	0	0	0			0	n=250
JP2017.4	145	0	0	0			0	n=369
JP2017.4	146	0	0	0			0	n=109
JP2017.4	147	0	0	0			0	n=75	1309
MJU	Medical Journal of Uzbekistan
JP	Paediatrics
		Scored by two evaluators
		Consensus-based score
		Excluded from evaluation

## Sheet: coding
journal name/year/number	Medicine Journal of Uzbekistan 2010 N5	MJU2010.5
	Journal Paediatrics	JP
